# Supplementary material for: TE-C36 carbon: a new semiconducting phase with an all-sp3 bonding network
Source: Royal Society of Chemistry journal article supplement (doi:10.1039/c7ra11448f), 2018-01-01
Supplement: c7ra11448f1.pdf [file c7ra11448f1.pdf]

## Supplementary Information

### TE-C36 carbon: a new semiconducting phase with an all-sp<sup>3</sup> bonding network

Yanheng Xu<sup>a</sup>, Yihua Lu<sup>a</sup>, Xi Zhu<sup>\*a</sup> and Min Wang<sup>\*b</sup>

<sup>a</sup>The Chinese University of Hong Kong, Shenzhen, No.2001 Longxiang Blvd., Longgang Dist., Shenzhen 518172, Guangdong, China. Email: zhuxi@cuhk.edu.cn.

<sup>b</sup>Institute for Clean Energy and Advanced Materials, Faculty of Materials and Energy, Southwest University, Chongqing 400715, China. Email: minwang@swu.edu.cn.

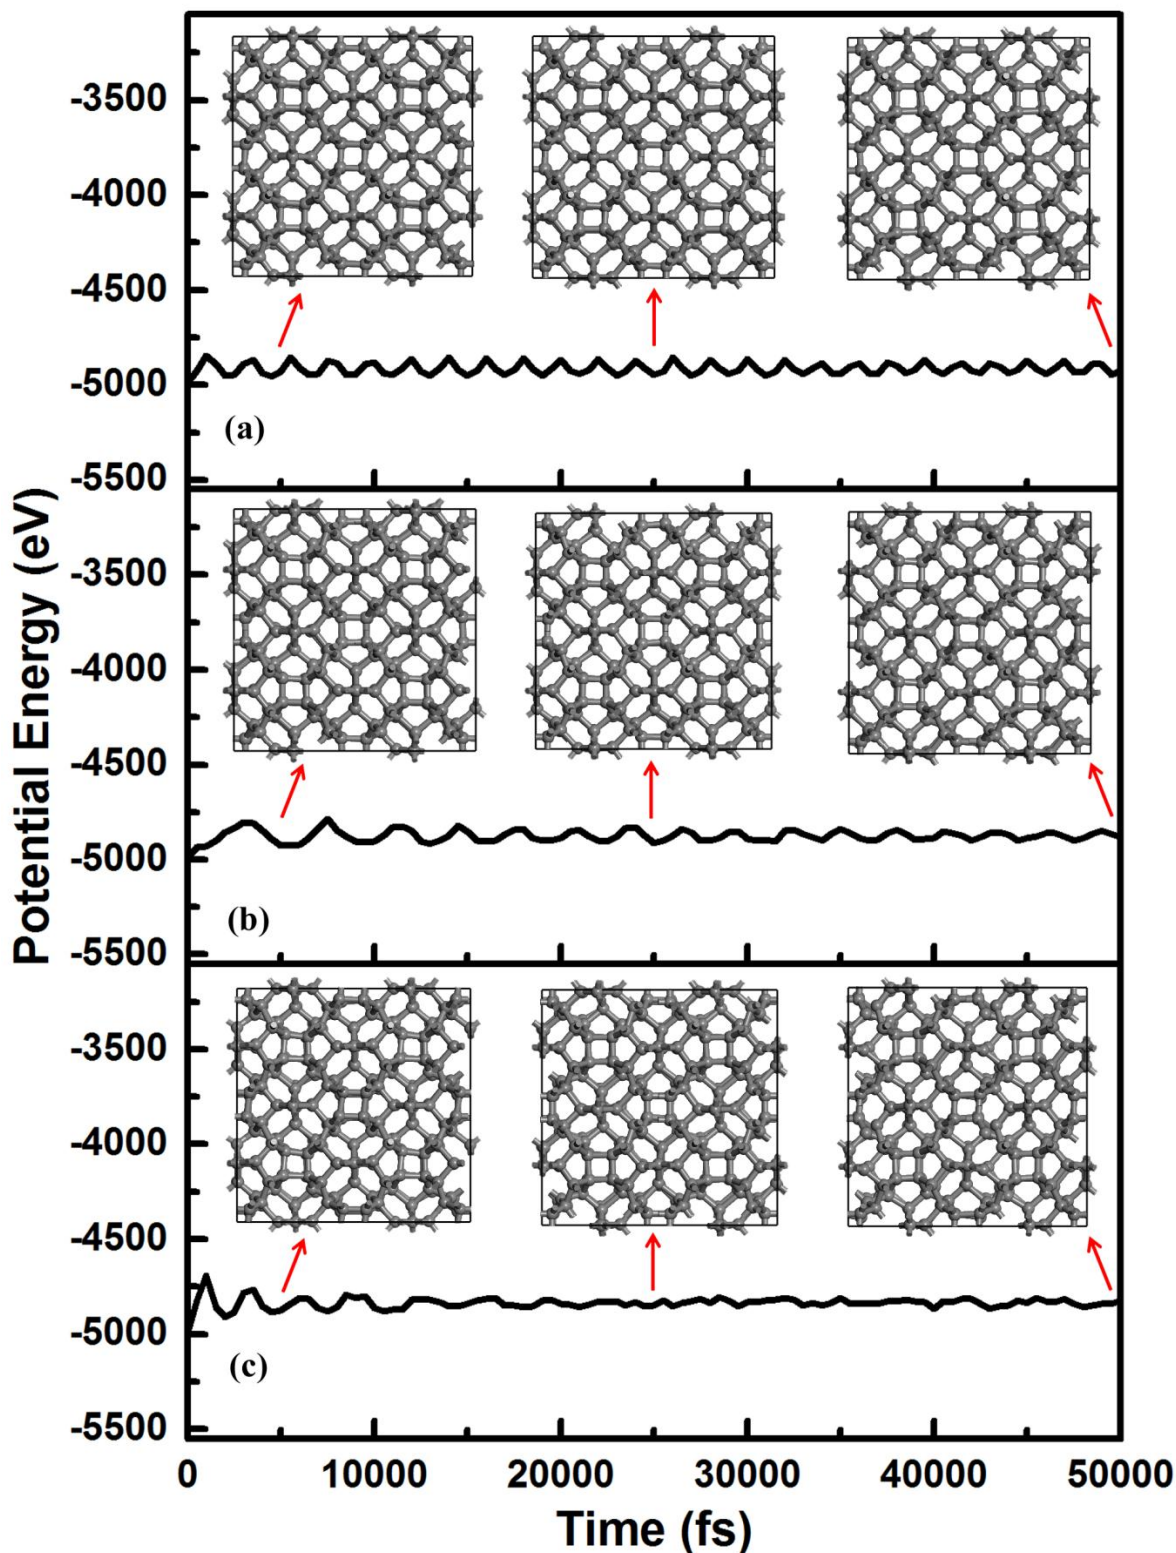

Fig. S1 Potential energy fluctuations of TE carbon in MD simulation at (a) 1000 K, (b) 1500 K and (c) 2000 K. The insets are the snapshots during the MD process.

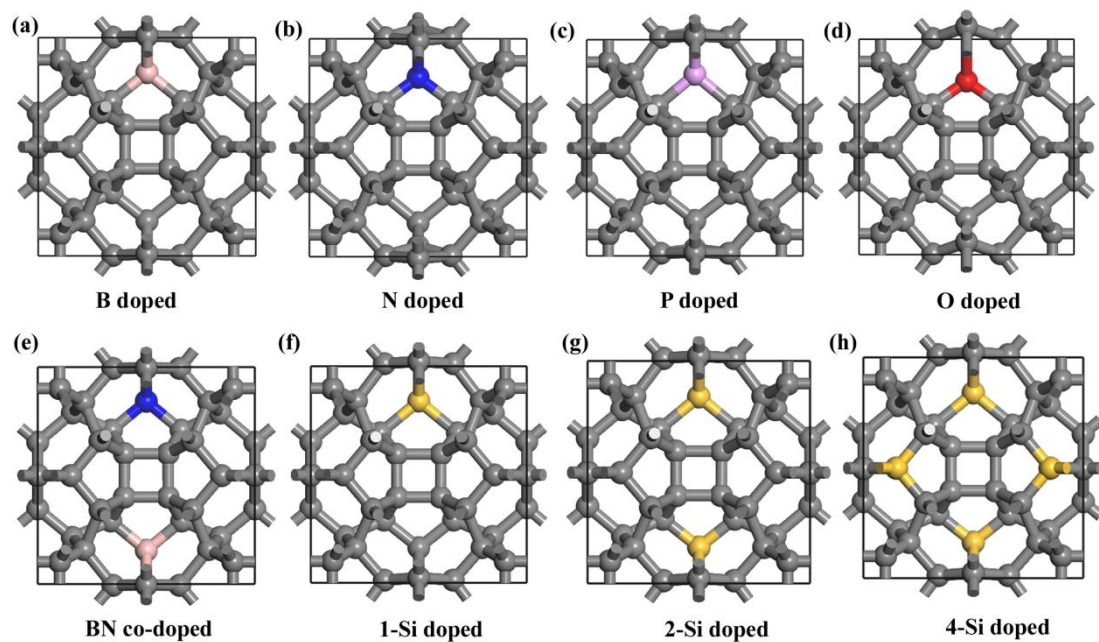

Fig. S2 (a) B doped TE carbon. (b) N doped TE carbon. (c) P doped TE carbon. (d) O doped TE carbon. (e) BN co-doped TE carbon. (f) One Si atom doped TE carbon. (g) Two Si atoms doped TE carbon. (h) Four Si atoms doped TE carbon.

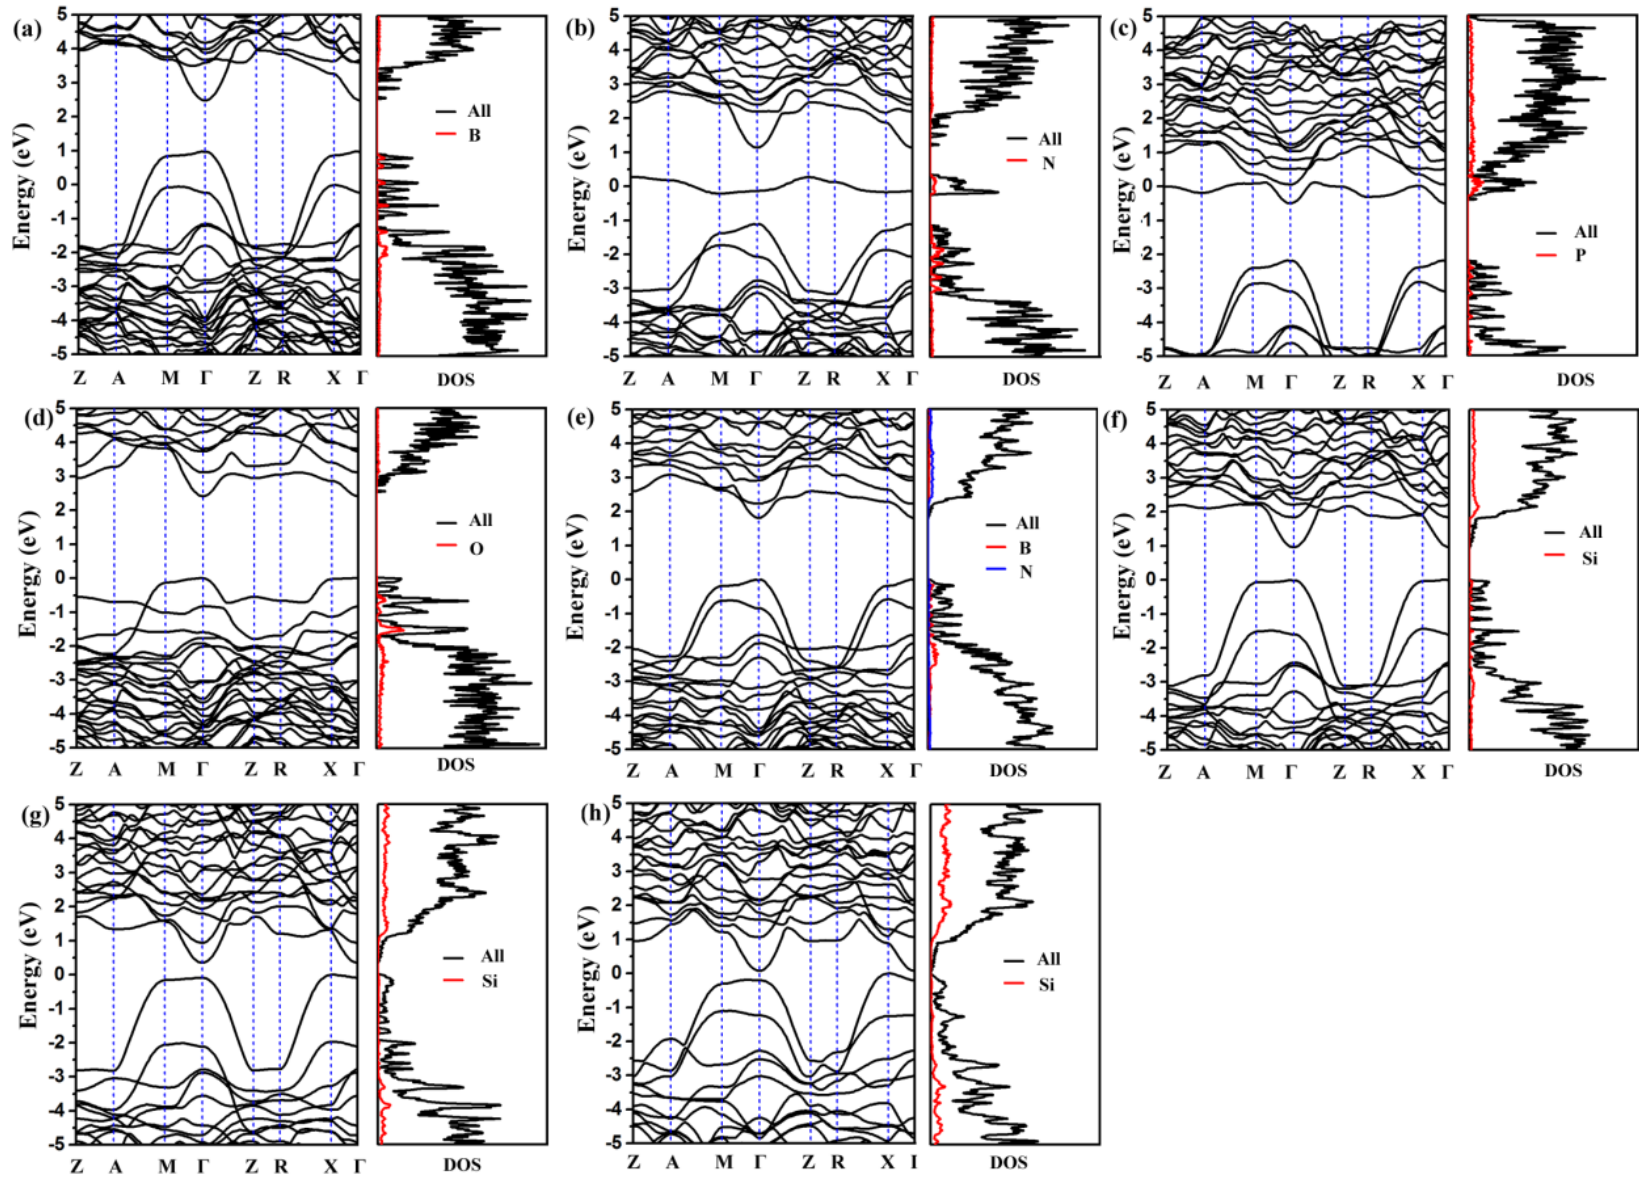

Fig. S3 (a)-(h) Band structures and partial density of states (DOS) for the doped structures in Fig. S2, respectively. Fermi level is set to zero. Z(0,0,0), A(0.5,0.5,0.5), M(0.5,0.5,0),  $\Gamma$ (0, 0, 0), R(0,0.5,0.5), X(0,0.5,0).
